# Supplementary material for: Calcite Nanocrystals Investigated Using X-ray Absorption Spectroscopy
Source: MDPI journal article supplement (doi:10.3390/cryst11050490), 2021-04-27
Supplement: s1 [file s1]

# Calcite Nanocrystals Investigated using X-ray Absorption Spectroscopy

Varsha Singh <sup>1</sup>, Anil Kumar Paidi<sup>2</sup>, Cheol-Hwee Shim<sup>1</sup>, So Hee Kim<sup>1</sup>, Sung Ok Won<sup>1</sup>, Jitendra Pal Singh<sup>2,\*</sup>, Sangsul Lee<sup>2</sup> and Keun Hwa Chae<sup>1,\*</sup>

<sup>1</sup>Advanced Analysis Center, Korea Institute of Science and Technology, Seoul-02792, Republic of Korea

<sup>2</sup>Pohang Accelerator Laboratory, Pohang University of Science and Technology, Pohang-37673, Republic of Korea

**Table S1: Crystallographic data obtained from Rietveld refinement**

|                               | CNS 1       | CNS 2       | CNS 3       |
|-------------------------------|-------------|-------------|-------------|
| Formula weight                | 100.0869    | 100.0869    | 100.0869    |
| Crystal system                | Trigonal    | Trigonal    | Trigonal    |
| Space group                   | $R\bar{3}c$ | $R\bar{3}c$ | $R\bar{3}c$ |
| $a$ (Å)                       | 4.98352(26) | 4.99026(17) | 4.98898(16) |
| $b$ (Å)                       | 4.98352(26) | 4.99026(17) | 4.98898(16) |
| $c$ (Å)                       | 17.1297(14) | 17.1438(9)  | 17.1223(8)  |
| V                             | 368.428(28) | 369.730(18) | 369.075(17) |
| wRp                           | 10.21       | 12.56       | 11.11       |
| Rp                            | 8.25        | 9.49        | 8.46        |
| Chi <sup>2</sup> ( $\chi^2$ ) | 1.21        | 3.28        | 2.61        |

**Table S2: Bands observed in the FTIR spectra of calcite nanocrystals**

| Nanocrystals |     | FTIR Bands (cm <sup>-1</sup> ) |     |
|--------------|-----|--------------------------------|-----|
| CNS1         | 873 | 712                            | 636 |
| CNS2         | 872 | 712                            | 638 |
| CNS3         | 874 | 712                            | 639 |

**Table S3. Main edge, E<sub>o</sub> and positions of spectral features A<sub>1</sub>, A<sub>2</sub>, A<sub>3</sub>, A<sub>4</sub> and in eV for different nanocrystals**

| Nanocrystals | E <sub>o</sub> | A <sub>1</sub> | A <sub>2</sub> | A <sub>3</sub> | A <sub>4</sub> |
|--------------|----------------|----------------|----------------|----------------|----------------|
| CNS1         | 4042.7±0.4     | 4049.4±0.4     | 4060.9±0.4     | 4078.4±0.4     | 4093.4±0.4     |
| CNS2         | 4042.6±0.4     | 4049.4±0.4     | 4060.9±0.4     | 4078.4±0.4     | 4093.4±0.4     |
| CNS3         | 4042.8±0.4     | 4049.4±0.4     | 4060.9±0.4     | 4078.4±0.4     | 4093.4±0.4     |

**Table S4.** Coordination number (*N*), Bond-distance (*R*), Debye-Waller factor ( $\sigma^2$ ), energy-correction ( $\epsilon_0$ ) and R-factor for calcite nanocrystals.

| Nanocrystals | Shell | <i>N</i> | <i>R</i> (Å) | $\sigma^2$ (Å <sup>2</sup> ) | $\epsilon_0$ (eV) | <i>R</i> -Factor |
|--------------|-------|----------|--------------|------------------------------|-------------------|------------------|
| <b>CNS1</b>  | Ca-O  | 5.7      | 2.39         | 0.004*                       | 6.74*             | 0.03             |
|              | Ca-Ca | 4.1      | 3.13         | 0.026*                       |                   |                  |
| <b>CNS2</b>  | Ca-O  | 5.1      | 2.28         | 0.004*                       | -4.533*           | 0.02             |
|              | Ca-Ca | 6.6      | 2.93         | 0.003                        |                   |                  |
| <b>CNS3</b>  | Ca-O  | 5.4      | 2.27         | 0.005*                       | -3.73*            | 0.03             |
|              | Ca-Ca | 6.5      | 2.97         | 0.004*                       |                   |                  |
| <b>Std</b>   | Ca-O  | 6        | 2.35         |                              |                   |                  |
|              | Ca-Ca | 6        | 3.15         |                              |                   |                  |

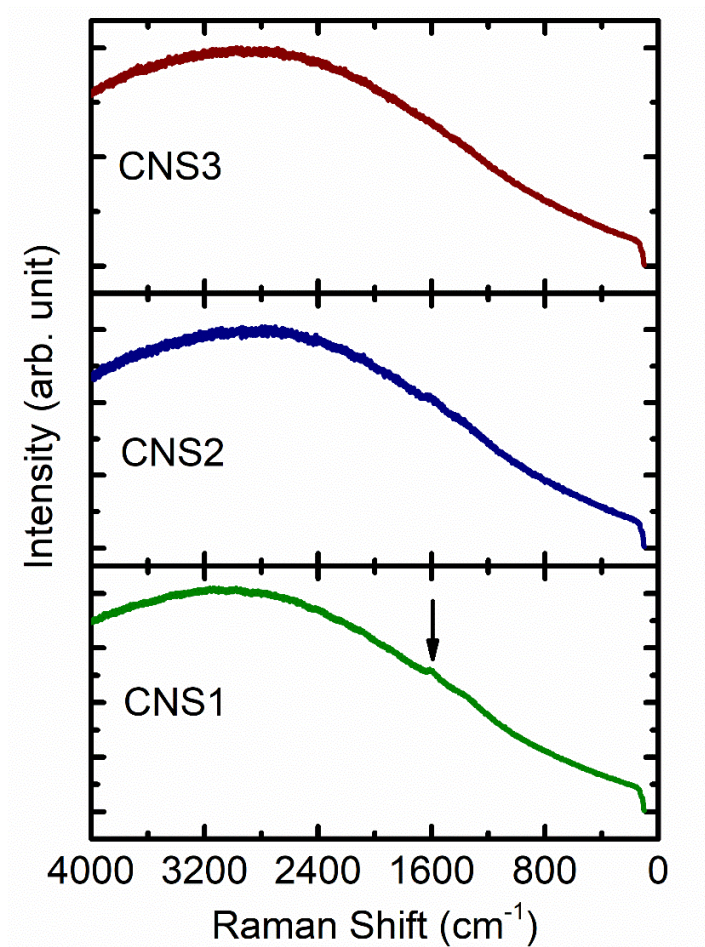

Figure S1: Raman Spectra of CNS1, CNS2 and CNS3

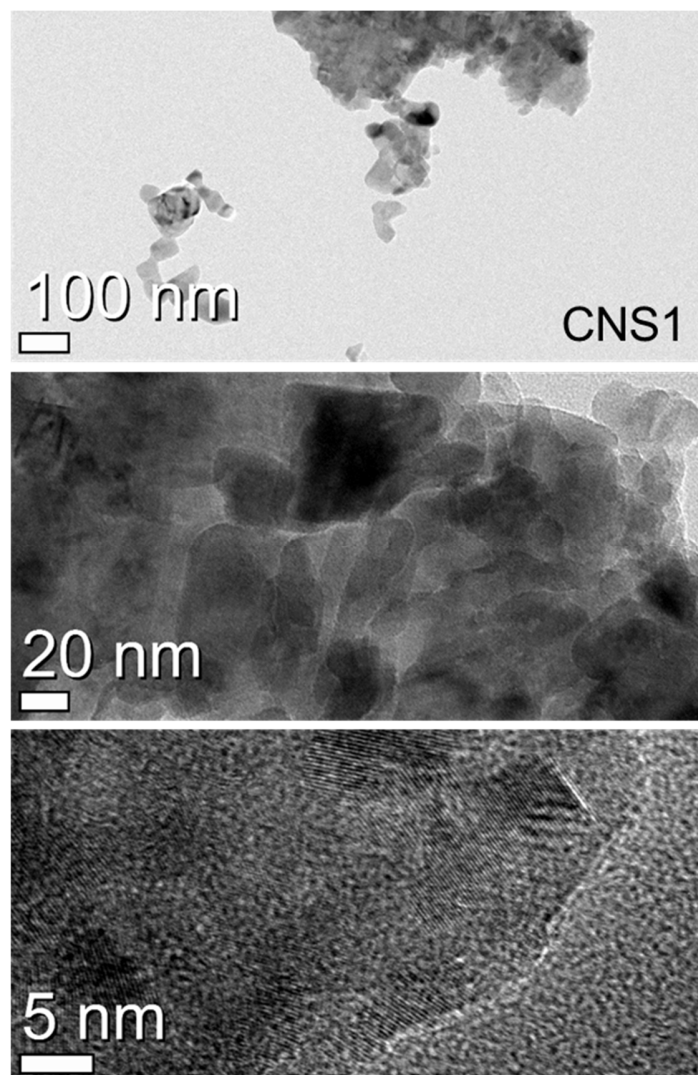

**Figure S2:** TEM micrographs of CNS1 at different magnifications

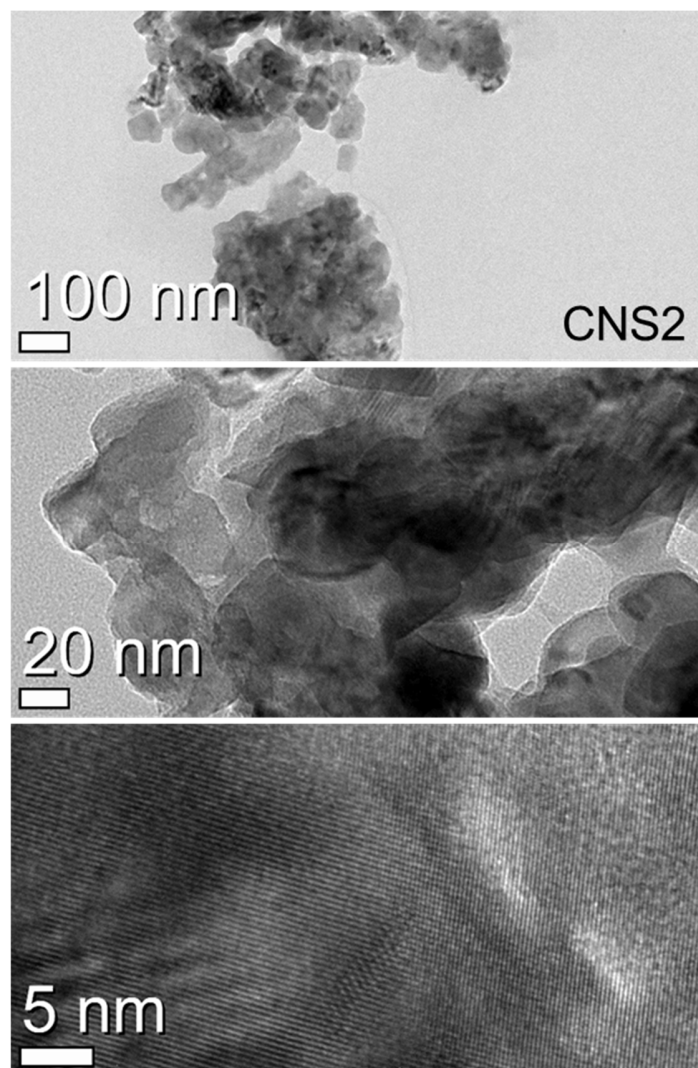

**Figure S3:** TEM micrographs of CNS2 at different magnifications



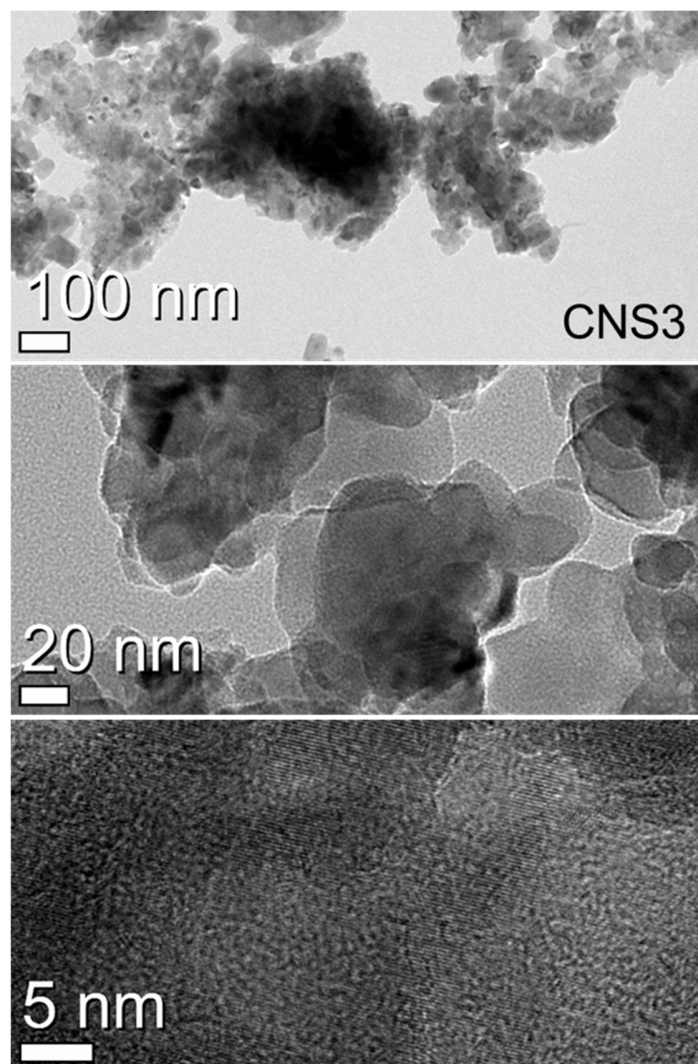

**Figure S4:** TEM micrographs of CNS3 at different magnifications

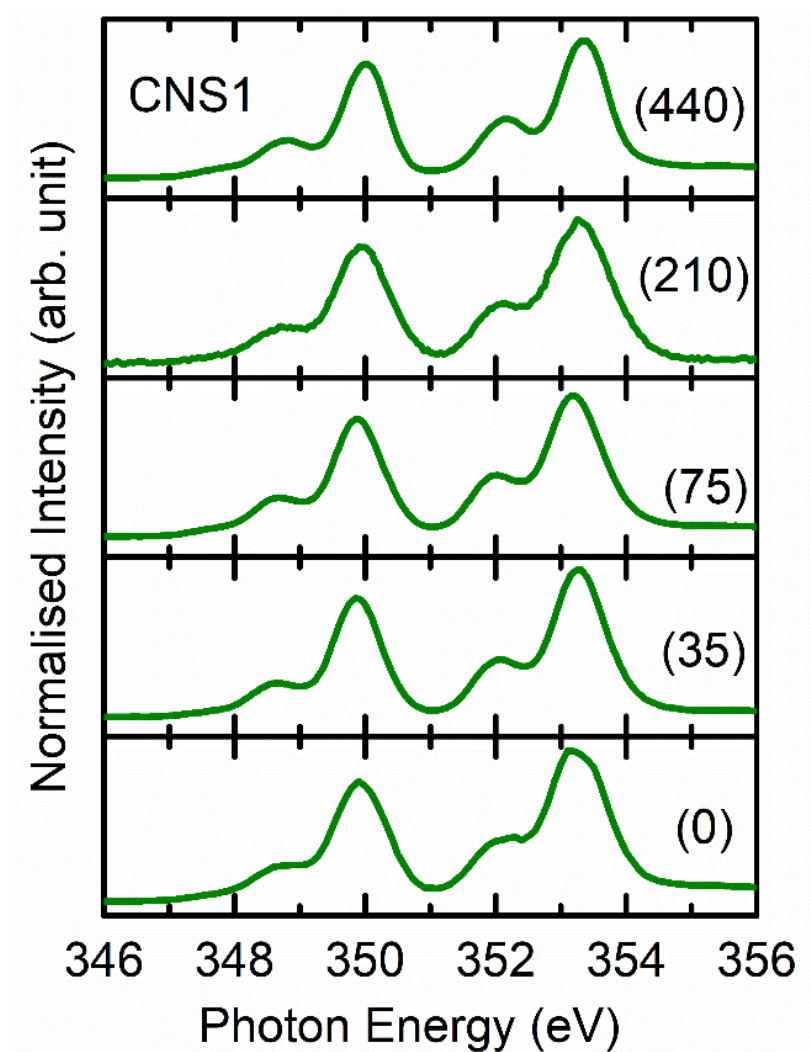

Figure S5: Ca *L*-edge spectra measured at different durations for CNS1

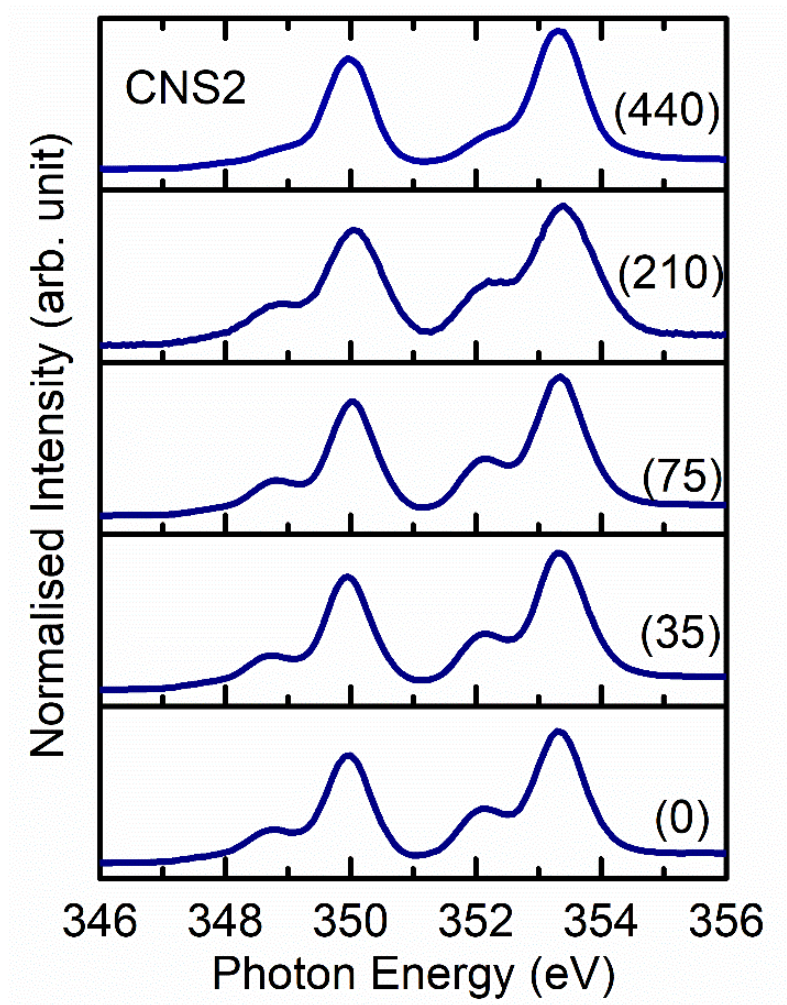

**Figure S6:** Ca *L*-edge spectra measured at different duration for CNS2

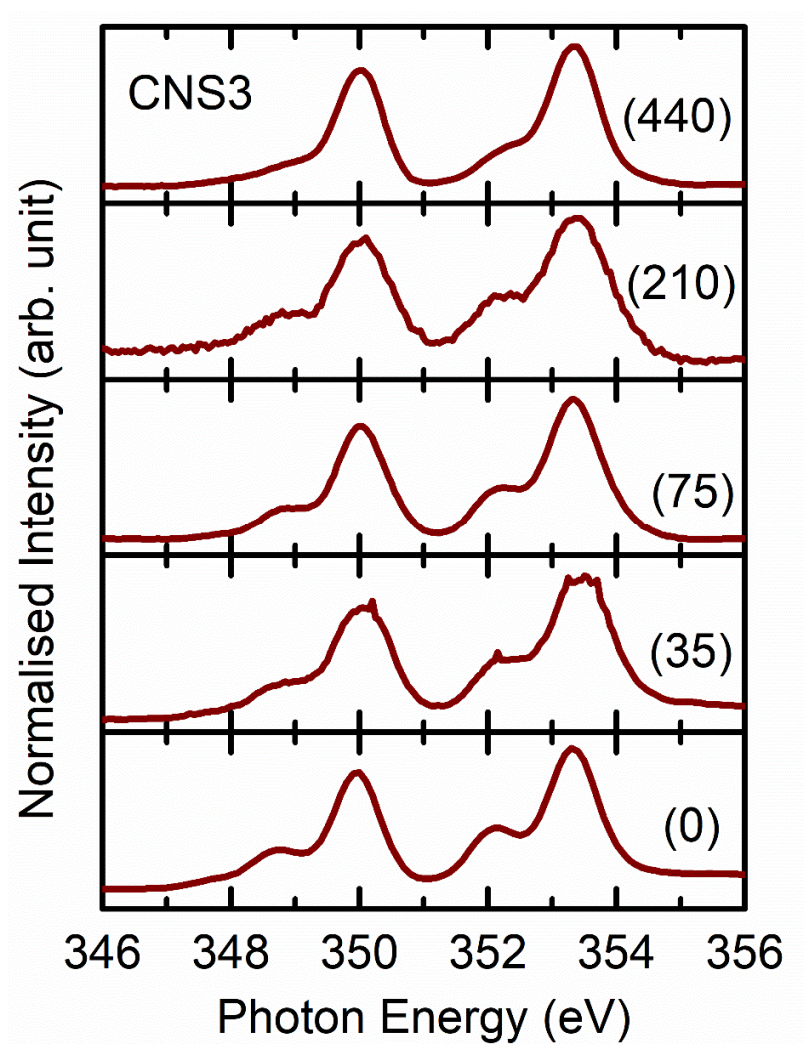

**Figure S7:** Ca *L*-edge spectra measured at different duration for CNS3
